# Supplementary material for: Differences in the Clinical and Hematological Characteristics of COVID-19 Patients with and without Type 2 Diabetes
Source: Hindawi journal article supplement (doi:10.1155/2020/1038585), 2020-12-07

Supplementary Figure 2. Representative data of chest CT images of COVID-19 patients with and without T2D.

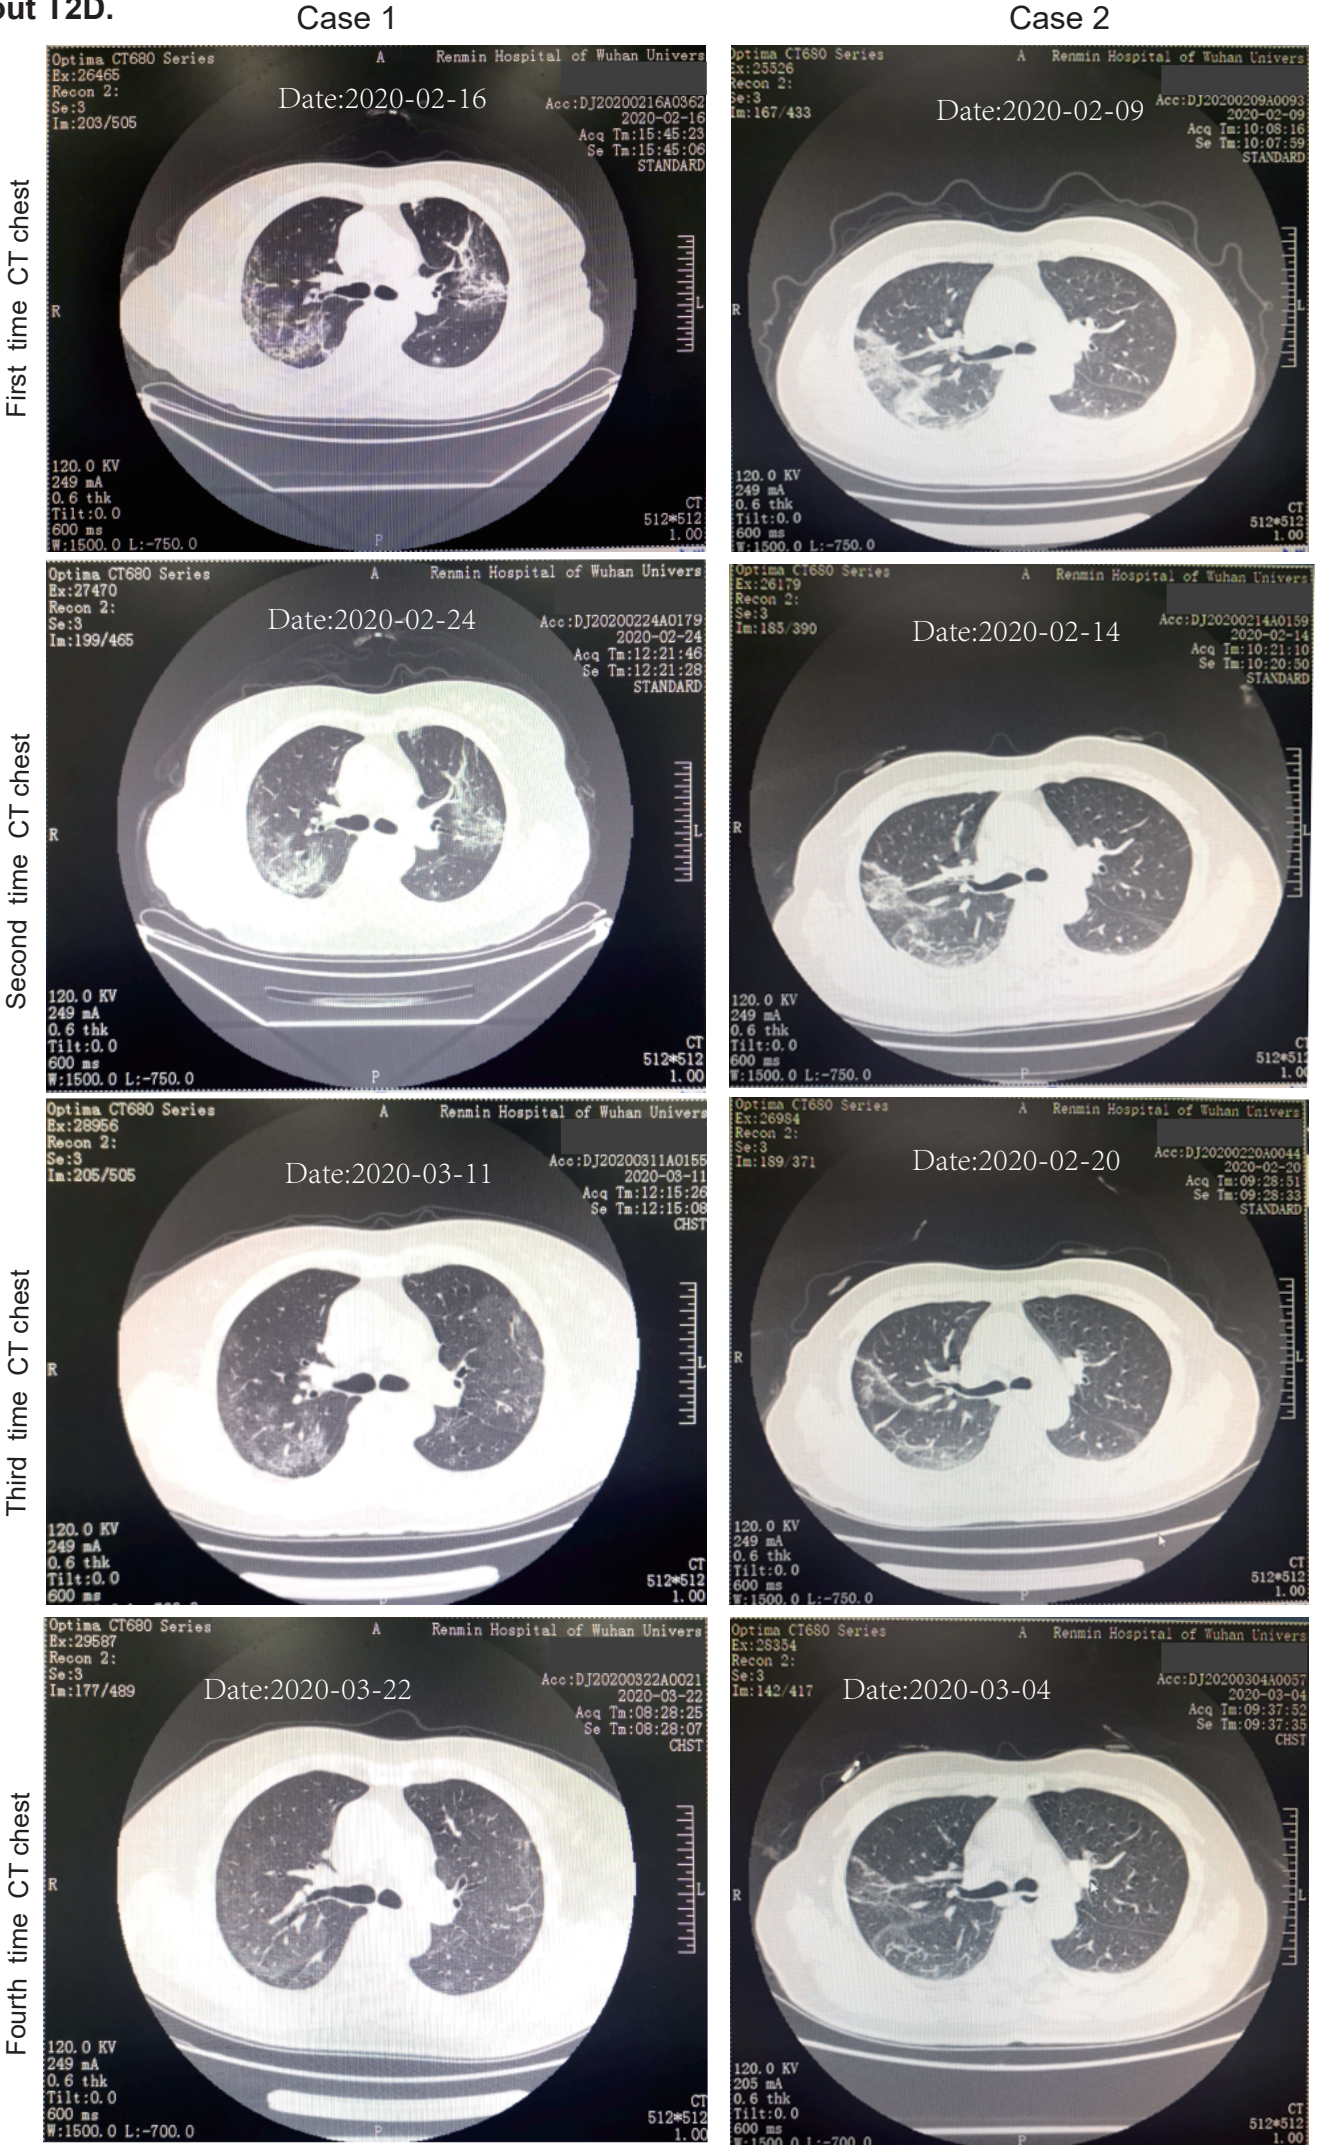

Supplement: f2 [file 1038585.f2.ai]
